# Supplementary material
Source: publisher figshare collection journal article supplement (https://rs.figshare.com/ndownloader/files/38934329)
Supplement: Supplementary file 1 [file 38934329]

## Sheet: Model parameter estimates
Euparkeria muscle parameters (Sauria EPB)			ISTR	PIFE	PIFI	IF	AMB	IT	FMT	PIT	ADD	ILFB	FTE	FTI1	FTI2	FTI3	CFB	CFL	GAST	FB	FL	PP	FDL	FHL	TC	EDL	EDB*	AHD*	FDBP*	FDBS*		Total Force/BW
Simple model	Alpha shape centroid	Mmuscle*cos(θ)/Mbody	0.00031715	0.0021615	0.004244	0.00072882	0.0029334	0.0018301	0.0018611	0.0032881	0.0015037	0.0015666	0.0022344	0.00084276	0.0010451	0.00061002	0.001881	0.017072	0.0016479	0.00065488	0.00045204	0.00010275	0.00062211	0.00014496	0.00084266	0.00081279	0.00014521	0.000741758	0.000129958	0.000247996
		LO/Mbody0.33	0.011387	0.024295	0.032339	0.017507	0.033126	0.016959	0.014449	0.039315	0.036281	0.036693	0.038356	0.040811	0.041511	0.031427	0.022006	0.058058	0.019103	0.025006	0.017196	0.0056282	0.01917	0.011001	0.03911	0.029535	0.0147976	0.0211675	0.00679901	0.0182645
		M*	0.000285385	0.00194501	0.00381893	0.000655823	0.0026396	0.0016468	0.0016747	0.00295877	0.00135309	0.00140969	0.00201061	0.000758351	0.000940425	0.000548922	0.0016926	0.0153621	0.00148285	0.000589288	0.000406765	9.24588e-05	0.000559801	0.000130441	0.000758261	0.000731383	0.000130666	0.000667465	0.000116941	0.000223157
		LO	0.0109973	0.0234634	0.0312321	0.0169078	0.0319922	0.0163785	0.0139544	0.0379693	0.0350392	0.0354371	0.0370432	0.0394141	0.0400902	0.0303513	0.0212528	0.0560708	0.0184492	0.0241501	0.0166074	0.00543556	0.0185139	0.0106245	0.0377714	0.0285241	0.0142911	0.020443	0.00656629	0.0176394
		Fmax	7.3445	23.4609	34.6063	10.9778	23.3512	28.4565	33.9656	22.0543	10.9292	11.2585	15.3615	5.44545	6.63898	5.11856	22.54	77.5406	22.7476	6.90596	6.93196	4.81414	8.5576	3.47474	5.68161	7.25685	2.58769	9.24058	5.04038	3.58049
		Fmax/BW	0.832291	2.65863	3.92165	1.24402	2.6462	3.22474	3.84903	2.49923	1.23852	1.27584	1.74079	0.617087	0.752341	0.580044	2.55427	8.78703	2.5778	0.782596	0.785542	0.545547	0.969761	0.393764	0.64385	0.822359	0.293242	1.04716	0.571185	0.405747		48.2603
	Convex hull centroid	Mmuscle*cos(θ)/Mbody	0.00033237	0.0019534	0.0036167	0.00067893	0.00288	0.0017863	0.0016944	0.0032442	0.0013507	0.0017198	0.0022241	0.00085331	0.0010765	0.00069979	0.0017305	0.014709	0.0017439	0.00045056	0.00056215	0.0001181	0.00072776	0.00015254	0.00074875	0.00080219	0.00014521	0.000741758	0.000129958	0.000247996
		LO/Mbody0.33	0.012091	0.022506	0.032432	0.016902	0.031037	0.018601	0.014746	0.041796	0.033315	0.035367	0.037354	0.039486	0.040907	0.03282	0.019204	0.052077	0.020332	0.02013	0.017879	0.0060299	0.020717	0.011294	0.03326	0.027025	0.0147976	0.0211675	0.00679901	0.0182645
		Mmuscle	0.00029908	0.00175775	0.00325446	0.00061093	0.00259154	0.00160739	0.00152469	0.00291927	0.00121542	0.00154755	0.00200134	0.000767844	0.00096868	0.0006297	0.00155718	0.0132358	0.00156923	0.000405433	0.000505846	0.000106271	0.000654869	0.000137262	0.000673757	0.000721844	0.000130666	0.000667465	0.000116941	0.000223157
		LO	0.0116772	0.0217357	0.0313219	0.0163235	0.0299747	0.0179643	0.0142413	0.0403654	0.0321747	0.0341565	0.0360755	0.0381345	0.0395069	0.0316967	0.0185467	0.0502945	0.0196361	0.019441	0.017267	0.00582351	0.0200079	0.0109074	0.0321216	0.0261	0.0142911	0.020443	0.00656629	0.0176394
		Fmax	7.2488	22.8876	29.4066	10.5924	24.4692	25.3236	30.3004	20.4682	10.6912	12.8229	15.7009	5.69863	6.93942	5.62258	23.7622	74.4807	22.6177	5.90222	8.29117	5.16472	9.26335	3.56158	5.93638	7.82741	2.58769	9.24058	5.04038	3.58049
		Fmax/BW	0.821447	2.59366	3.33241	1.20035	2.77289	2.86971	3.43369	2.31949	1.21154	1.45311	1.77925	0.645778	0.786387	0.637161	2.69277	8.44028	2.56308	0.66885	0.939569	0.585275	1.04974	0.403604	0.67272	0.887016	0.293242	1.04716	0.571185	0.405747		47.0771
	Arithmethic centroid	Mmuscle*cos(θ)/Mbody	0.00035401	0.002035	0.002672	0.00060515	0.0022638	0.0017229	0.0015352	0.0023549	0.0012622	0.0011851	0.001974	0.00069115	0.0010757	0.00070244	0.0013267	0.011746	0.0016702	0.00035534	0.00055714	0.00011008	0.00069016	0.00014491	0.00072794	0.00055038	0.00014521	0.000741758	0.000129958	0.000247996
		LO/Mbody0.33	0.011739	0.024095	0.029248	0.01742	0.024723	0.021573	0.015968	0.040445	0.03199	0.037297	0.038042	0.038345	0.043854	0.032092	0.017872	0.04285	0.01955	0.016852	0.016508	0.0058538	0.016191	0.010894	0.030851	0.026728	0.0147976	0.0211675	0.00679901	0.0182645
		M*	0.000318553	0.00183118	0.00240438	0.000544539	0.00203706	0.00155034	0.00138144	0.00211904	0.00113578	0.0010664	0.00177629	0.000621926	0.00096796	0.000632085	0.00119382	0.0105695	0.00150292	0.00031975	0.000501338	9.90546e-05	0.000621035	0.000130396	0.000655031	0.000495255	0.000130666	0.000667465	0.000116941	0.000223157
		LO	0.0113372	0.0232703	0.0282469	0.0168238	0.0238768	0.0208346	0.0154215	0.0390607	0.0308951	0.0360204	0.0367399	0.0370325	0.042353	0.0309936	0.0172603	0.0413834	0.0188809	0.0162752	0.015943	0.00565344	0.0156368	0.0105211	0.029795	0.0258132	0.0142911	0.020443	0.00656629	0.0176394
		Fmax	7.95227	22.2712	24.0906	9.16055	24.1459	21.0599	25.3525	15.3537	10.4045	8.37892	13.6833	4.75303	6.46828	5.77191	19.5752	72.2846	22.5283	5.56032	8.89973	4.95881	11.2404	3.50766	6.22204	5.43004	2.58769	9.24058	5.04038	3.58049
		Fmax/BW	0.901165	2.52381	2.72998	1.03809	2.73626	2.38654	2.87299	1.73991	1.17905	0.949513	1.55061	0.538621	0.732996	0.654082	2.2183	8.19142	2.55295	0.630104	1.00853	0.561941	1.27378	0.397494	0.705093	0.615341	0.293242	1.04716	0.571185	0.405747		43.0059
	3D model	Mmuscle*cos(θ)/Mbody	0.00068662	0.00377917	0.00232722	0.00115822	0.00197082	0.0108247	0.00352481	0.00225459	0.00367101	0.0043878	0.0038194	0.00263656	0.00285911	0.00157965	0.0046946	0.0275104	0.00398942	0.000418864	0.00121986	0.000530623	0.00120706	0.000327997	0.00151942	0.00114285	0.000400358	2.14069e-05	0.00019626	0.000285472
		LO/Mbody0.33	0.011739	0.024095	0.029248	0.01742	0.024723	0.021573	0.015968	0.040445	0.03199	0.037297	0.038042	0.038345	0.043854	0.032092	0.017872	0.04285	0.01955	0.016852	0.016508	0.0058538	0.016191	0.010894	0.030851	0.026728	0.0147976	0.0211675	0.00679901	0.0182645
		M*	0.00061785	0.00340065	0.00209413	0.00104221	0.00177343	0.00974055	0.00317177	0.00202877	0.00330333	0.00394832	0.00343685	0.00237249	0.00257274	0.00142144	0.0042244	0.024755	0.00358985	0.000376911	0.00109768	0.000477477	0.00108616	0.000295145	0.00136724	0.00102839	0.000360259	1.92628e-05	0.000176603	0.000256879
		LO	0.0113372	0.0232703	0.0282469	0.0168238	0.0238768	0.0208346	0.0154215	0.0390607	0.0308951	0.0360204	0.0367399	0.0370325	0.042353	0.0309936	0.0172603	0.0413834	0.0188809	0.0162752	0.015943	0.00565344	0.0156368	0.0105211	0.029795	0.0258132	0.0142911	0.020443	0.00656629	0.0176394
		Fmax	15.4238	41.3596	20.9821	17.5327	21.0209	132.316	58.2092	14.6997	30.2606	31.0227	26.4751	18.1316	17.1921	12.9799	69.2679	169.298	53.8109	6.55433	19.486	23.9031	19.659	7.93943	12.9872	11.2753	7.1345	0.26668	7.61189	4.12155
		Fmax/BW	1.74785	4.68694	2.37773	1.98684	2.38213	14.9943	6.59637	1.6658	3.42918	3.51554	3.00021	2.0547	1.94823	1.47091	7.84956	19.1852	6.09794	0.742748	2.20818	2.70874	2.22779	0.89971	1.47173	1.27774	0.808494	0.0302206	0.862592	0.467061		98.6944
	Mbody [kg]	0.899842																									*Pedal muscle parameters were scaled from the Wiseman et al. 2021
																											OpenSim model of a Nile crocodile (and normalized using DDNC01)
																											and could not be estimated from the EPB as the other hindlimb
																											muscles due to missing data.

## Sheet: OpenSim muscle parameters
Euparkeria individual OpenSim muscle parameters			ISTR	PIFE1	PIFE2	PIFE3	PIFI1	PIFI2	IF	AMB	IT1	IT2	IT3	FMTE	FMTI	PIT	ADD1	ADD2	ILFB	FTE	FTI1	FTI2	FTI3	CFB	CFL	GL	GM	FB	FL	PP	FDL	FHL	EDL	TA	EDB	AHD	FDBS	FDBP		Sum Fmax
Model 1	Alpha shape centroid	max_isometric_force	7.3445	7.82031	7.82031	7.82031	17.3032	17.3032	10.9778	23.3512	9.4855	9.4855	9.4855	16.9828	16.9828	22.0543	5.4646	5.4646	5.62926	15.3615	5.44545	6.63898	5.11856	22.54	77.5406	11.3738	11.3738	6.90596	6.93196	4.81414	8.5576	3.47474	5.68161	7.25685	2.58769	9.24058	5.04038	3.58049		420.24
		optimal_fibre_length	0.0109973	0.0234634	0.0234634	0.0234634	0.0312321	0.0312321	0.0169078	0.0319922	0.0163785	0.0163785	0.0163785	0.0139544	0.0139544	0.0379693	0.0350392	0.0350392	0.0354371	0.0370432	0.0394141	0.0400902	0.0303513	0.0212528	0.0560708	0.0184492	0.0184492	0.0241501	0.0166074	0.00543556	0.0185139	0.0106245	0.0377714	0.0285241	0.0142911	0.020443	0.00656629	0.0176394
Model 2	Convex hull centroid	max_isometric_force	7.2488	7.62919	7.62919	7.62919	14.7033	14.7033	10.5924	24.4692	8.44119	8.44119	8.44119	15.1502	15.1502	20.4682	5.34559	5.34559	12.8229	15.7009	5.69863	6.93942	5.62258	23.7622	74.4807	11.3088	11.3088	5.90222	8.29117	5.16472	9.26335	3.56158	5.93638	7.82741	2.58769	9.24058	5.04038	3.58049		415.429
		optimal_fibre_length	0.0116772	0.0217357	0.0217357	0.0217357	0.0313219	0.0313219	0.0163235	0.0299747	0.0179643	0.0179643	0.0179643	0.0142413	0.0142413	0.0403654	0.0321747	0.0321747	0.0341565	0.0360755	0.0381345	0.0395069	0.0316967	0.0185467	0.0502945	0.0196361	0.0196361	0.019441	0.017267	0.00582351	0.0200079	0.0109074	0.0321216	0.0261	0.0142911	0.020443	0.00656629	0.0176394
Model 3	Arithmethic centroid	max_isometric_force	7.95227	7.42374	7.42374	7.42374	12.0453	12.0453	9.16055	24.1459	7.01997	7.01997	7.01997	12.6763	12.6763	15.3537	5.20224	5.20224	8.37892	13.6833	4.75303	6.46828	5.77191	19.5752	72.2846	11.2642	11.2642	5.56032	8.89973	4.95881	11.2404	3.50766	6.22204	5.43004	2.58769	9.24058	5.04038	3.58049		379.503
		optimal_fibre_length	0.0113372	0.0232703	0.0232703	0.0232703	0.0282469	0.0282469	0.0168238	0.0238768	0.0208346	0.0208346	0.0208346	0.0154215	0.0154215	0.0390607	0.0308951	0.0308951	0.0360204	0.0367399	0.0370325	0.042353	0.0309936	0.0172603	0.0413834	0.0188809	0.0188809	0.0162752	0.015943	0.00565344	0.0156368	0.0105211	0.029795	0.0258132	0.0142911	0.020443	0.00656629	0.0176394
Model 4	3D model	max_isometric_force	15.4238	8.29996	21.7922	11.2674	6.13615	14.8459	17.5327	21.0209	34.3036	58.5153	39.4975	19.328	38.8813	14.6997	13.4846	16.776	31.0227	26.4751	18.1316	17.1921	12.9799	69.2679	169.298	34.5918	19.2191	6.55433	19.486	23.9031	19.659	7.93943	12.9872	11.2753	7.1345	0.26668	7.61189	4.12155		870.922
		optimal_fibre_length	0.0113372	0.0232703	0.0232703	0.0232703	0.0282469	0.0282469	0.0168238	0.0238768	0.0208346	0.0208346	0.0208346	0.0154215	0.0154215	0.0390607	0.0308951	0.0308951	0.0360204	0.0367399	0.0370325	0.042353	0.0309936	0.0172603	0.0413834	0.0188809	0.0188809	0.0162752	0.015943	0.00565344	0.0156368	0.0105211	0.029795	0.0258132	0.0142911	0.020443	0.00656629	0.0176394
Belly as proportion of total muscle		1/Mmuscle*Mbelly	1	0.200678	0.526897	0.272425	0.292447	0.707553	1	1	0.259254	0.442238	0.298508	0.332043	0.667957	1	0.445617	0.554383	1	1	1	1	1	1	1	0.64284	0.35716	1	1	1	1	1	1	1	1	1	1	1
mass for Fmax subdivision in 3D model
3D model Fmax differences (under/overestimation)																																								Min	Max	Average	Across all muscles
	Simple model	3D vs alpha	2.10005	1.06133	2.78662	1.44079	0.354626	0.85799	1.59711	0.900209	3.61642	6.16893	4.16398	1.13809	2.28945	0.666523	2.46763	3.06993	5.51097	1.72347	3.32968	2.58956	2.53585	3.07311	2.18335	3.04135	1.68977	0.949083	2.81103	4.96519	2.29726	2.2849	2.28583	1.55375	2.75709	0.0288596	1.51018	1.15112		0.0288596	6.16893	2.3042	2.07244
		3D vs convex hull	2.12778	1.08792	2.85643	1.47688	0.417331	1.0097	1.65522	0.859078	4.06383	6.93212	4.67913	1.27576	2.56639	0.718173	2.52257	3.13828	2.41932	1.68622	3.18174	2.47745	2.30853	2.91505	2.27305	3.05883	1.69947	1.11049	2.35021	4.62816	2.12224	2.22919	2.18773	1.44049	2.75709	0.0288596	1.51018	1.15112		0.0288596	6.93212	2.24783	2.09644
		3D vs arithmetic	1.93955	1.11803	2.93548	1.51775	0.509423	1.23251	1.91393	0.87058	4.88657	8.33556	5.62644	1.52474	3.06725	0.957402	2.59208	3.22476	3.70247	1.93485	3.81474	2.6579	2.24881	3.53856	2.3421	3.07096	1.70622	1.17877	2.1895	4.82034	1.74896	2.26345	2.08729	2.07648	2.75709	0.0288596	1.51018	1.15112		0.0288596	8.33556	2.47446	2.2949
